## SHORT REPORT

# Increased cancer risk among surgeons in an orthopaedic hospital

Giuseppe Mastrangelo<sup>1</sup>, Ugo Fedeli<sup>1</sup>, Emanuela Fadda<sup>1</sup>, Angelo Giovanazzi<sup>2</sup>, Luca Scozzato<sup>1</sup> and Bruno Saia<sup>1</sup>

|                   |                                                                                                                                                                                                                                                                                                   |
|-------------------|---------------------------------------------------------------------------------------------------------------------------------------------------------------------------------------------------------------------------------------------------------------------------------------------------|
| <b>Background</b> | Five cancer cases over 7 years were reported in a small orthopaedic hospital where radiation protection practice was poor.                                                                                                                                                                        |
| <b>Aim</b>        | To investigate whether workers subject to routine radiation dosimetric assessment in that hospital had an increased cancer risk.                                                                                                                                                                  |
| <b>Methods</b>    | One hundred and fifty-eight workers subject to routine dose assessment and 158 age–sex-matched unexposed workers were questioned about cancer occurrence. All tumours were analysed as a single diagnostic category.                                                                              |
| <b>Results</b>    | Cumulative 1976–2000 cancer incidence was 29 (9/31), 6 (8/125) and 4% (7/158) in orthopaedics, exposed other than orthopaedics, and unexposed workers, respectively. At logistic regression analysis, working as orthopaedic surgeon significantly ( $P < 0.002$ ) increased the risk of tumours. |
| <b>Conclusion</b> | These findings caution against surgeons' underestimation of the potential radiation risk and insufficient promotion of safe work practices by their health care institutions.                                                                                                                     |
| <b>Key words</b>  | Cancer; dosimetric assessment; occupational exposure; orthopaedic surgeons; radiation.                                                                                                                                                                                                            |

## Introduction

Five cancer cases over 7 years were reported in a small orthopaedic hospital (Villa Igea, Trento, Italy) in radiation-exposed workers. In that hospital, until August 1999, the use of radiation protective measures during intra-operative fluoroscopy was discontinuous, and 60% of the total post-operative radiographs were performed in a corridor in front of the operating rooms where, usually, the personnel used to take off their heavy and uncomfortable lead apron and dosimeter.

To investigate whether workers subject to routine radiation dosimetric assessment in that hospital had an increased cancer risk, an epidemiological investigation was conducted.

## Methods

Using institutional records on personnel data available since 1976, we identified all the 158 workers subject to

dosimetric assessment and 158 unexposed workers, individually matched (1:1) for sex, birthdate and vital status. Each cohort included 62 women and 96 men. Cancer incidence was reconstructed from 1976 to 2000, by asking all subjects about date, hospital and histologic diagnosis in case of cancer (in decedents, the death certificate was obtained); moreover, exposed subjects were questioned regarding the use of dosimeter. Cumulative radiation dose estimated using statutory dosimeters was available.

In view of the low number of cases we collapsed all tumours into a single diagnostic category. Odds ratios with 95% confidence intervals were estimated by means of stepwise logistic regression analysis, where the independent variables were age, gender, cumulative X-ray exposure, length of exposure and occupation.

In the five cancer cases of interest, the cumulative radiation dose was reconstructed from the various hospital procedures used in the past. The cancer risk ( $P_e$ ) corresponding to this dose was obtained by BEIR V [1]; knowing the natural cancer risk ( $P_n$ ), the probability of causation ( $PC = P_e/(P_e + P_n)$ ) was calculated [2].

## Results

Information on disease was available in 99% of exposed and all (100%) unexposed workers. Twenty-six cancer

<sup>1</sup>Department of Environmental Medicine and Public Health, Section of Occupational Medicine, University of Padua, Italy.

<sup>2</sup>Unit of Prevention and Safety in Workplaces, Provincial Health Authority, Trento, Italy.

Correspondence to: Giuseppe Mastrangelo, Department of Environmental Medicine and Public Health, Section of Occupational Health, University of Padua, Via Giustiniani, 2-35128 Padua, Italy. Tel: +39 049 821 2543; fax: +39 049 821 2542; e-mail: giuseppe.mastrangelo@unipd.it

**Table 1.** Malignant tumours and date of diagnosis among exposed and unexposed subjects by vital status

| Exposed                |                                                                         | Unexposed         |                                          |
|------------------------|-------------------------------------------------------------------------|-------------------|------------------------------------------|
| Year of diagnosis      | Tumours                                                                 | Year of diagnosis | Tumours                                  |
| <b>Decedents</b>       |                                                                         |                   |                                          |
| 1988                   | Spinocellular carcinoma <sup>a</sup>                                    | 1989              | Pancreatic tumour                        |
| 1993                   | Lung tumour <sup>a</sup>                                                | 1996              | Prostate, salivary gland, larynx tumours |
| 1998                   | Lung tumour <sup>a</sup>                                                |                   |                                          |
| 2000                   | Pancreatic tumour                                                       |                   |                                          |
| <b>Living subjects</b> |                                                                         |                   |                                          |
| 1993                   | Non-Hodgkin lymphoma <sup>b</sup> ; basal-cell carcinoma <sup>a,b</sup> | 1992              | Dermatofibrosarcoma                      |
| 1995                   | Cervix intra-epithelial neoplasm                                        | 1992              | Testis embryonic carcinoma               |
| 1995                   | Colon tumour <sup>a</sup>                                               | 1994              | Testis embryonic carcinoma               |
| 1996                   | Colon tumour <sup>b</sup>                                               | 1996              | Basal-cell carcinoma                     |
| 1997                   | Colon tumour                                                            | 1998              | Non-Hodgkin lymphoma                     |
| 1998                   | Ovary tumour <sup>b</sup>                                               | 1999              | Breast tumour                            |
| 1998                   | Non-Hodgkin lymphoma <sup>a,b</sup>                                     | 2000              | Pancreatic tumour                        |
| 1998                   | Rectum tumour                                                           |                   |                                          |
| 1999                   | Thyroid carcinoma <sup>b</sup>                                          |                   |                                          |
| 2000                   | Basal-cell carcinoma <sup>a</sup>                                       |                   |                                          |
| 2000                   | Humerus condrosarcoma <sup>a</sup>                                      |                   |                                          |
| 2000                   | Pancreatic tumour                                                       |                   |                                          |
| 2000                   | Basal-cell carcinoma <sup>a</sup>                                       |                   |                                          |

<sup>a</sup> Tumours found in orthopaedics.

<sup>b</sup> Tumours in initial cluster.

cases were identified, 17 in the exposed group and nine in the unexposed. Table 1 shows the diagnoses in these cases. Cumulative radiation dose averaged 35.2 (range = 0.04–517.8), 2.3 (0.00–17.9) and 7.5 (0.0–186) millisievert in orthopaedic surgeons, non-orthopaedic physicians and radiation-exposed non-physicians, respectively. In the corresponding groups, cumulative cancer incidence was 29 (9/31), 11 (2/18) and 6% (6/107), and it was 4% (7/158) in unexposed workers.

Table 2 shows that at logistic regression analysis, age ( $P < 0.034$ ) and working as an orthopaedic surgeon ( $P < 0.002$ ) were the variables significantly influencing the risk of tumours. We gathered all tumours to increase the statistical power; however, since outcomes were

**Table 2.** Logistic regression analysis: odds ratio (OR) with 95% confidence interval (CI) for all malignant tumours and two-tail probability of error ( $P$ ), by age and occupation (Terms)

| Terms                                     | OR   | CI        | $P$   |
|-------------------------------------------|------|-----------|-------|
| Age (years)                               | 1.04 | 1.00–1.08 | 0.034 |
| Occupational category <sup>a</sup>        |      |           |       |
| Health care workers other than physicians | 1.07 | 0.37–3.13 | 0.901 |
| Physicians other than orthopaedics        | 2.18 | 0.43–11.1 | 0.349 |
| Orthopaedics                              | 5.37 | 1.87–15.4 | 0.002 |

<sup>a</sup> References: unexposed workers.

aetiologically unrelated, the gain probably came at the cost of underestimation of cancer risk in orthopaedics.

Except for 50 subjects (33%) who always used the dosimeter on the thorax and behind the apron, in other radiation-exposed workers the dosimeter use was irregular and inconstant. Therefore, radiation dose estimation using statutory dose meters was an unreliable indicator. This might account for radiation not being selected as a significant risk factor at logistic regression.

In two out of five cancer cases reported to the authorities (two non-Hodgkin's lymphomas in two orthopaedic surgeons), reconstructed radiation dose (to body areas excluding hands) was 685 and 360 millisievert and PC was 63 and 43%, respectively, using the multiple myeloma model since BEIR V treats myeloma and non-Hodgkin's as having equal radiation dose–response relationships. Reconstructed dose (and PC) was 168 (26%), 179 (14%) and 150 millisievert (8%) in the other cases.

## Conclusion

These findings suggest that surgeons need to be aware of the potential radiation risk in orthopaedics [3] and that risk-taking behaviour needs addressing through promotion of safe work practices by their employing institutions [4].

## Conflicts of interest

None declared.

## References

1. Committee on Biological Effects of Ionizing Radiation, Board on Radiation Effects Research, National Research Council. *Health Effects of Exposure to Low Levels of Ionizing Radiation: BEIR V*. Washington, DC: National Academy Press, 1990.
2. Breitenstein BD. The probability that a specific cancer and a specified radiation exposure are causally related. *Health Phys* 1988;**55**:397–408.
3. Finestone A, Schlesinger T, Amir H, Richter E, Milgrom C. Do physicians correctly estimate radiation risks from medical imaging? *Arch Environ Health* 2003; **58**:59–61.
4. McCarthy ML, Bosse MJ, Preas MA, *et al*. Orthopaedic trauma surgeons' attitudes and practices towards blood-borne pathogens. *J Orthop Trauma* 1996;**10**: 383–388.
